# Supplementary material
Source: Springer Nature journal article supplement (https://www.springermedizin.de/resource/supplementary/13075_2012_3636_MOESM3_ESM.pdf/9694980)

Gene expression relative to  $\beta$ -actin

### A. Aggrecan

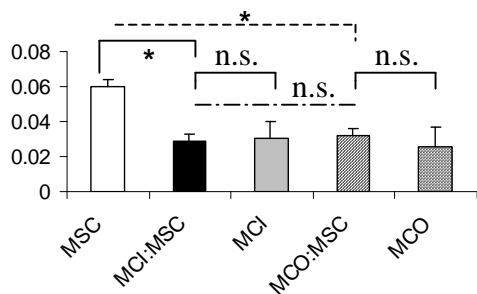

### B. Collagen I

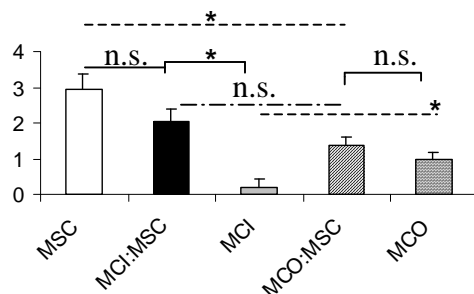

### C. Collagen II

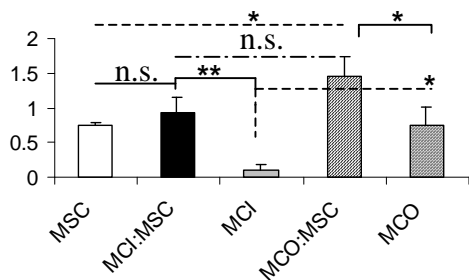

### D. Collagen X

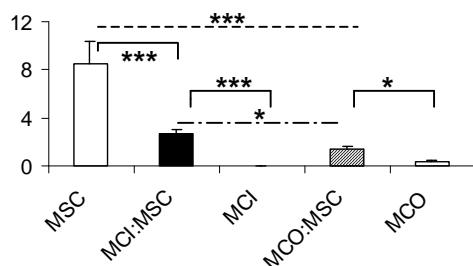

### E. MMP-13

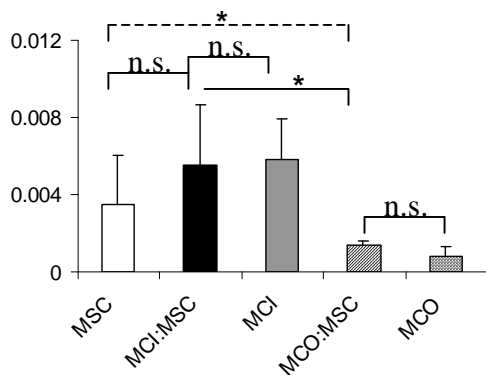

### F. Indian Hedgehog

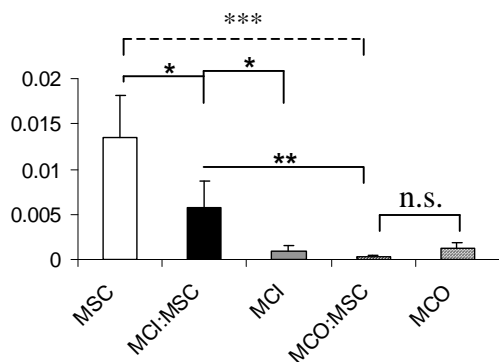

### G. Sox9

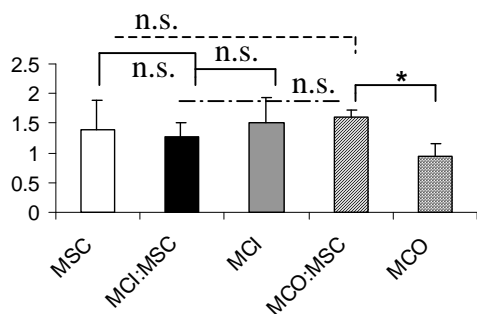

### H. Versican

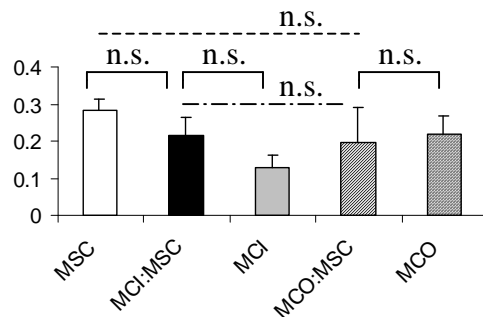

Supplement: MOESM3 [file 9694980]
